# Supplementary material for: The feasibility analysis of omission of elective irradiation to level IB lymph nodes in low-risk nasopharyngeal carcinoma based on the 2013 updated consensus guideline for neck nodal levels
Source: Springer Nature journal article supplement (doi:10.1186/s13014-017-0869-x), 2017-08-18
Supplement: MOESM1 [file 14225188]

## **Supplementary materials**

Supplementary Table 1. Comparison of clinical factors between high-risk and low-risk subgroups.

Supplementary Table 2. Distribution of regional recurrence by risk-stratified subgroups.

Supplementary Table 3. The grades of xerostomia by elective irradiation to level IB.

Supplementary Figure 1. Isodose distribution of submandibular glands.

Supplementary Table 1. Comparison of clinical factors between high-risk and low-risk subgroups

| Variable            | Low-risk    |             | p value | High-risk   |             | p value |
|---------------------|-------------|-------------|---------|-------------|-------------|---------|
|                     | IB RT (-)   | IB RT (+)   |         | IB RT (-)   | IB RT (+)   |         |
| Age                 | 51.7+/-11.4 | 50.5+/-11.7 | 0.281   | 48.7+/-12.0 | 46.2+/-12.4 | 0.134   |
| Gender M/F          | 157/59      | 45/22       | 0.382   | 63/21       | 125/40      | 0.895   |
| T stage T1/T2/T3/T4 | 79/69/36/32 | 23/22/18/4  | 0.111   | 23/25/23/13 | 51.57/47/10 | 0.112   |
| N stage N0/N1/N2/N3 | 79/128/0/9  | 3/57/0/7    | 0.000*  | 0/16/49/19  | 0/40/80/45  | 0.336   |
| Nodal necrosis -/+  | 186/30      | 45/22       | 0.000*  | 45/39       | 65/100      | 0.033*  |
| Nodal ES -/+        | 159/57      | 26/41       | 0.000*  | 19/65       | 21/144      | 0.044*  |
| Chemotherapy -/+    | 73/143      | 4/63        | 0.000*  | 2/82        | 2/163       | 0.605   |
| Boost RT to LN -/+  | 206/10      | 65/2        | 0.738   | 76/8        | 142/23      | 0.318   |

\* p< 0.05.

Abbreviation: ES= extracapsular spread. RT=radiation. LN= lymph nodes.

Supplementary Table 2. Distribution of regional recurrence by risk-stratified subgroups

| Patients and groups              | Distribution of regional recurrence             |
|----------------------------------|-------------------------------------------------|
| Low-risk group                   |                                                 |
| No elective level Ib irradiation |                                                 |
| Patient #1                       | N.A.                                            |
| Patient #2                       | Left IB                                         |
| Patient #3                       | Left IIB                                        |
| Elective level Ib irradiation    |                                                 |
| Patient #4                       | Right VB                                        |
| High-risk group                  |                                                 |
| No elective level Ib irradiation |                                                 |
| Patient #5                       | Right IIB                                       |
| Elective level Ib irradiation    |                                                 |
| Patient #6                       | Right IIB, III                                  |
| Patient #7                       | Right IIB, III                                  |
| Patient #8                       | Right IIA                                       |
| Patient #9                       | Left retropharyngeal, IIA, IIB, III             |
| Patient #10                      | Left retropharyngeal, IIB                       |
| Patient #11                      | N.A.                                            |
| Patient #12                      | Right III, IVA, IVB, VIII                       |
| Patient #13                      | Left IIA                                        |
| Patient #14                      | Right IIB, III                                  |
| Patient #15                      | Right IIB, IVA                                  |
| Patient #16                      | Right IIA                                       |
| Patient #17                      | Left IVA                                        |
| Patient #18                      | Bilateral IIA, IIB, III; Right IVA              |
| Patient #19                      | Left IIB, III                                   |
| Patient #20                      | Left VIII                                       |
| Patient #21                      | Left III                                        |
| Patient #22                      | Right retropharyngeal, IIA, IIB, III, VII, VIII |

Supplementary Table 3. The grades of xerostomia by elective irradiation to level IB at one year after IMRT

| Grade of xerostomia | Elective irradiation of level IB |            |           |
|---------------------|----------------------------------|------------|-----------|
|                     | No                               | Unilateral | Bilateral |
| 0                   | 166                              | 72         | 54        |
| 1                   | 6                                | 0          | 4         |
| 2                   | 118                              | 60         | 33        |
| 3                   | 10                               | 5          | 4         |
| Total               | 300                              | 137        | 95        |

Supplementary Figure 1

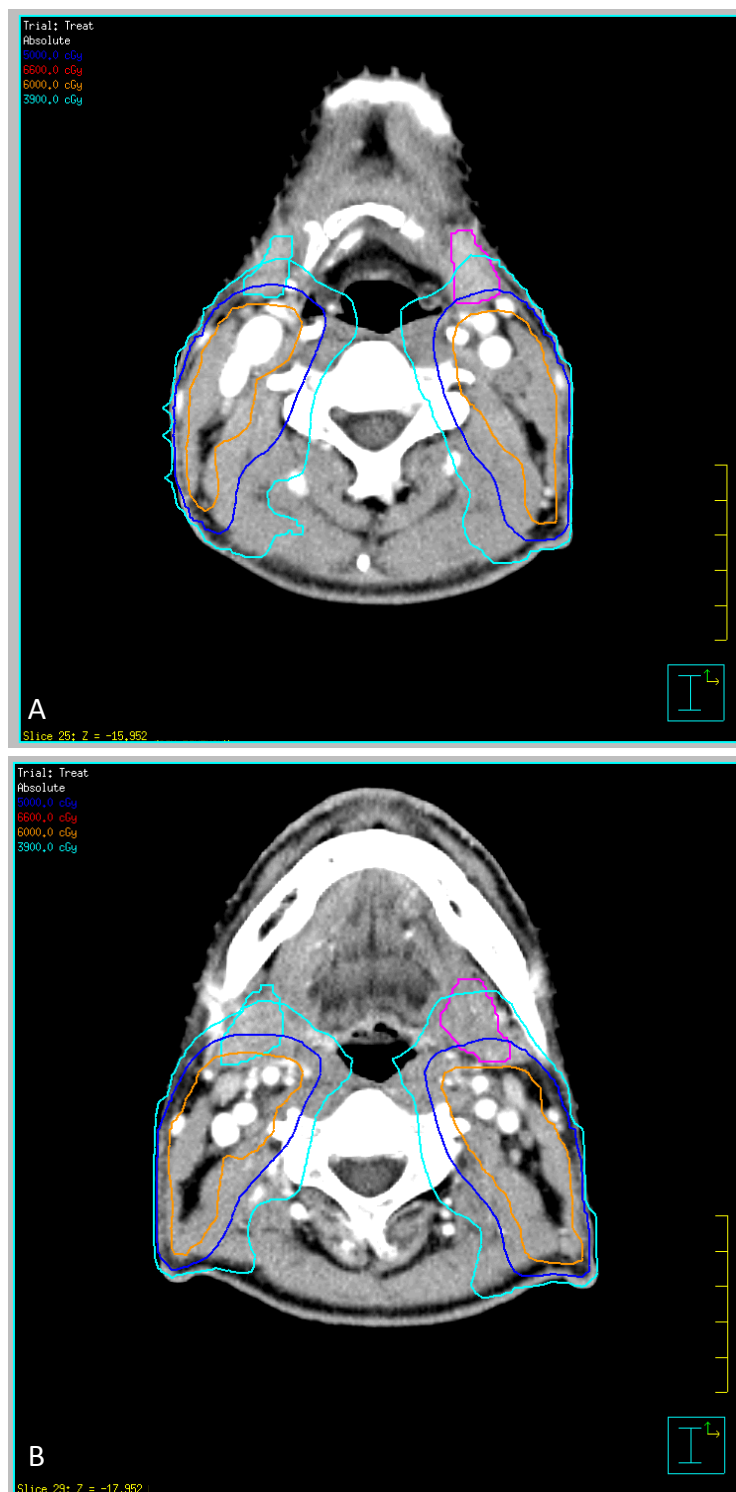

**Supplementary Fig 1 Isodose distribution of submandibular glands (A and B)**

It is noted that the submandibular glands were contoured and two thirds of the glands were covered by 39Gy isodose line. Half of the glands were covered by 50Gy isodose line. Isodose lines included 39Gy isodose line (light blue), 50Gy isodose line (dark blue), 60Gy isodose line (orange) and 66Gy isodose line (red).
